# Supplementary material
Source: PubMed Central journal article supplement (PMC9209693)
Supplement: thoraxjnl-2021-216882supp003.pdf [file thoraxjnl-2021-216882supp003.pdf]

Table S4: Patient demographic data between control and IPF patients in the 2014/2015 Cohorts from LTRC.

|                                       | IPF          | Control       | p-value | Statistical Test |
|---------------------------------------|--------------|---------------|---------|------------------|
| n                                     | 16           | 18            |         |                  |
| Sex (M/F)                             | 9/7          | 9/9           | 0.7155  | Chi-square       |
| Age (yr)*                             | 57 [50-60]   | 67 [62-73]    | 0.0003  | Wilcoxon         |
| BMI (kg/m <sup>2</sup> )              | 28.57 ± 0.7  | 29.91 ± 1.3   | 0.8050  | Wilcoxon         |
| Race (Caucasian/African American)     | 13/3         | 16/2          | 0.5302  | Chi-square       |
| Ever smoker (y/n)                     | 9/6          | 11/5          | 0.6109  | Chi-square       |
| Smoking history (pack years) *        | 8 [2.5-42.5] | 21 [10-40]    | 0.1688  | Wilcoxon         |
| FEV <sub>1</sub> (% pred)             | 58.56 ± 3.7  | 103.7 ± 4.8   | <0.0001 | Wilcoxon         |
| FVC (% pred)                          | 52.94 ± 4.0  | 102.7 ± 4.3   | <0.0001 | Wilcoxon         |
| FEV <sub>1</sub> /FVC                 | 0.88 ± 0.03  | 0.74 ± 0.02   | 0.0002  | Wilcoxon         |
| DLCO (% pred)                         | 29.92 ± 6.1  | 92.44 ± 5.6   | <0.0001 | Wilcoxon         |
| St George's Respiratory Questionnaire | 65.92 ± 6.7  | 17.22 ± 4.2   | <0.0001 | Wilcoxon         |
| Six Minute Walk Test (m)              | 243.5 ± 33.3 | 338.7 ± 39.29 | 0.1254  | Wilcoxon         |

Data are mean ± SEM

\* Median [Inter-quartile range]

FEV<sub>1</sub>= Forced expiratory volume in one second

FVC= Forced Vital Capacity

DLCO= Diffusing capacity of carbon monoxide

Pack years= pack year smoking history calculated as the number of cigarette packs smoked/day multiplied by the number of years smoked
