# Supplementary material
Source: PubMed Central journal article supplement (PMC9209693)
Supplement: thoraxjnl-2021-216882supp004.pdf [file thoraxjnl-2021-216882supp004.pdf]

Table S5: Patient demographic data of non-IPF and IPF patients from the Lung Genomics Research Consortium.

|                                            | IPF              | Control          | p-value | Statistical Test |
|--------------------------------------------|------------------|------------------|---------|------------------|
| n                                          | 160              | 132              |         |                  |
| Sex (M/F)                                  | 110/50           | 66/66            | <0.01   | Chi-square       |
| Age (yr)                                   | 65 [60-70]       | 65 [57-72]       | 0.98    | Wilcoxon         |
| BMI (kg/m <sup>2</sup> )                   | 29.6 ± 0.6       | 28.7 ± 0.7       | 0.4     | Wilcoxon         |
| Race (Caucasian/Hispanic/African American) | 148/1/5          | 95/1/3-NA:33     | 0.95    | Chi-square       |
| Ever smoker (y/n)                          | 26/130           | 6/86             | <0.01   | Chi-square       |
| Smoking history (pack years) *             | 23 [10 – 38]     | 26 [9 – 47]      | 0.34    | Wilcoxon         |
| FEV <sub>1</sub> (% pred)                  | 72 [58-82]       | 95 [86-103]      | <0.0001 | Wilcoxon         |
| FVC (% pred)                               | 64 [53-76]       | 93 [86-103]      | <0.0001 | Wilcoxon         |
| FEV <sub>1</sub> /FVC                      | 0.8 [0.7-0.8]    | 0.8 [0.7-0.8]    | <0.0001 | Wilcoxon         |
| DLCO (% pred)                              | 48 [35-60]       | 83 [74-94]       | <0.0001 | Wilcoxon         |
| St George's Respiratory Questionnaire *    | 43.5 [30 – 61.8] | 5.6 [1.4 – 15.8] | <0.0001 | Wilcoxon         |
| Six Minute Walk Test (m)                   | 376 [318 – 434]  | 442 [391 – 506]  | <0.0001 | Wilcoxon         |

\*Data are presented as median [IQR]

FEV<sub>1</sub>= Forced expiratory volume in one second

FVC= Forced Vital Capacity

DLCO= Diffusing capacity of carbon monoxide

Pack years= pack year smoking history calculated as the number of cigarette packs smoked/day multiplied by the number of years smoked
