# Supplementary material
Source: PubMed Central journal article supplement (PMC9209693)
Supplement: thoraxjnl-2021-216882supp006.pdf [file thoraxjnl-2021-216882supp006.pdf]

Table S7: Primers sets to detect mouse mRNAs

| <b>Genes</b>   | <b>Primer sequences</b>                                              |
|----------------|----------------------------------------------------------------------|
| <i>Col1A1</i>  | FW 5'- CACCCTCAAGAGCCTGAGTC-3'<br>RV 5'- AGACGGCTGAGTAGGGAACA-3'     |
| <i>Fn-1</i>    | FW 5'- AATGGAAAAGGGGAATGGAC -3'<br>RV 5'- CTCGGTTGTCCTTCTTGCTC -3'   |
| <i>Scgb1A1</i> | FW 5'-GATGTCCGAAGAAGCTGGAGT -3'<br>RV 5'- CTCTACCACCCAAAGACTGCT -3'  |
| <i>Krt5</i>    | FW 5'- ACCTTCGAAACACCAAGCAC -3'<br>RV 5'- GTTGGCACACTGCTTCTTGA -3'   |
| <i>Spp1</i>    | FW 5'-TCCCTCGATGTCATCCCTGT -3'<br>RV 5'- ATCACATCCGACTGATCGGC -3'    |
| <i>Hspa5</i>   | FW 5'-CCTTGTGTTTGACCTGGGTG -3'<br>RV 5'- CCATGACCCGCTGATCAAAG -3'    |
| <i>Xbp1s</i>   | FW 5'-CTGAGTCCGCAGCAGGTG -3'<br>RV 5'-GACAGGGTCCAACCTTGTCCA -3'      |
| <i>Pdia1</i>   | FW 5'-TTTGATGAAGGCCGCAACAA -3'<br>RV 5'- TCAGCTTGCCGTCATAGTCA -3'    |
| <i>Pdia3</i>   | FW 5'-TATGATGGGCCTAGGACTGC -3'<br>RV 5'- TGCTGGCTGCTTTTAGGAAT -3'    |
| <i>Pdia5</i>   | FW 5'-GGGAAGAACAGCAGACAAGC -3'<br>RV 5'- TCTTACAGTGTGGGCACCAA -3'    |
| <i>Pdia6</i>   | FW 5'-GGTGAGCTGCACCTTCTTTC -3'<br>RV 5'- GCTGCTTCTTCCATTCTGG -3'     |
| <i>Pdia15</i>  | FW 5'-AAAGGAATTCCCAGGCTTGT -3'<br>RV 5'- CCGTTGTGTTCTCCCACTTT -3'    |
| <i>Gapdh</i>   | FW 5'-AGGTCGGTGTGAACGGATTTG -3'<br>RV 5'-TGTAGACCATGTAGTTGAGGTCA -3' |
| <i>Pp1</i>     | FW 5'-TTTTCATCTGCACTGCCAAG -3'<br>RV 5'- TCGAGTTGTCCACAGTCAGC-3'     |
| <i>Rp2</i>     | FW 5'-TTGCCAGCAATTCGTGTGA -3'<br>RV 5'- CCAGTTGAGCTCTCCTGACA -3'     |
