# Supplementary material
Source: PubMed Central journal article supplement (PMC9209693)
Supplement: thoraxjnl-2021-216882supp013.pdf [file thoraxjnl-2021-216882supp013.pdf]

Table S6: Antibodies used in this research study

| <b>Antibody</b> | <b>Company</b>           | <b>Catalog No.</b> |
|-----------------|--------------------------|--------------------|
| PDIA3           | LSBio                    | LS-B9768           |
| SCGB1A1         | Santa Cruz Biotechnology | sc-390313          |
| Osteopontin     | R&D systems              | AF808              |
| GAPDH           | BioLegend                | 919501             |
| $\beta$ ACTIN   | Sigma                    | A5441              |
