# Supplementary material
Source: PubMed Central journal article supplement (PMC9209693)

Figure S1

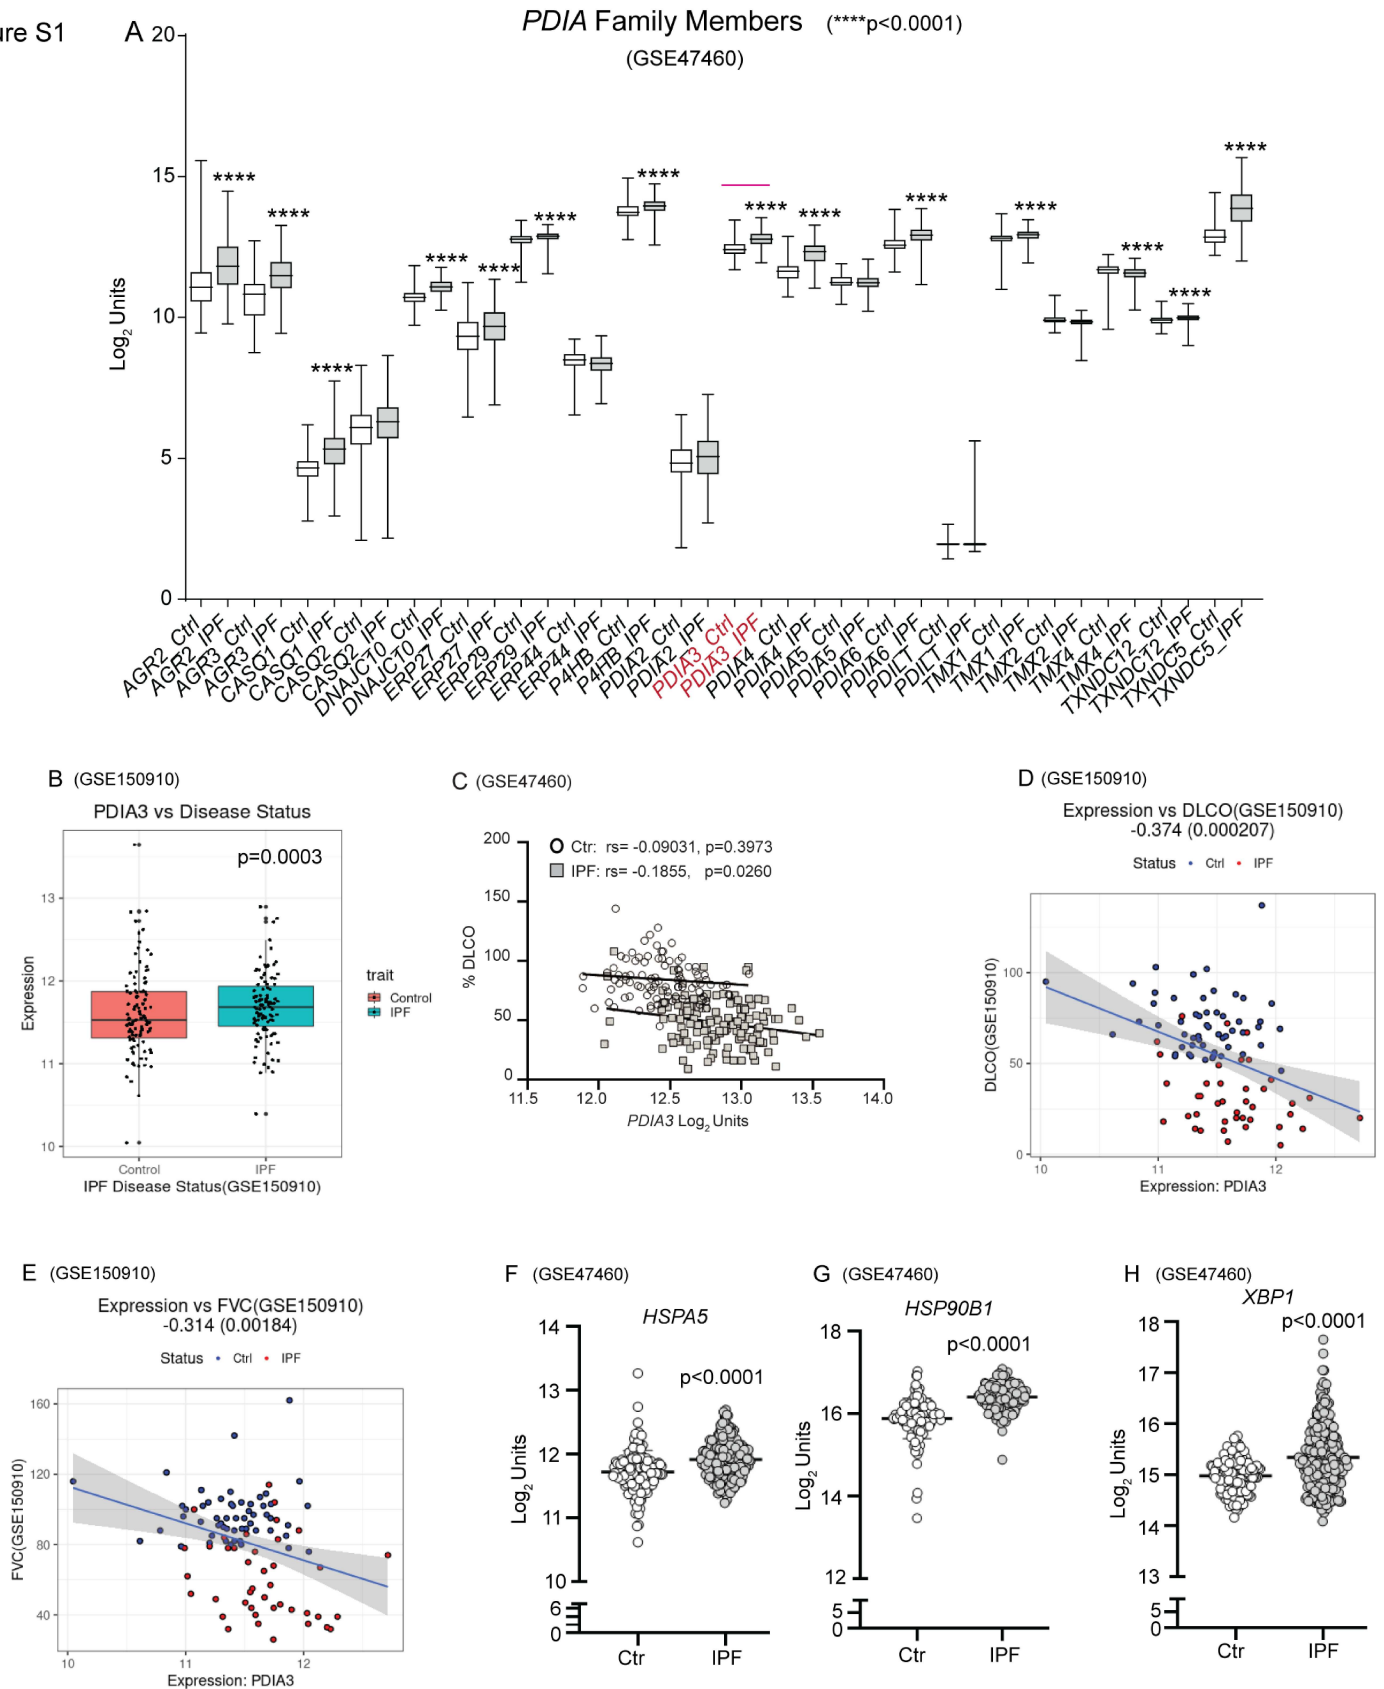

Supplement: thoraxjnl-2021-216882supp002.pdf [file thoraxjnl-2021-216882supp002.pdf]

Figure S5

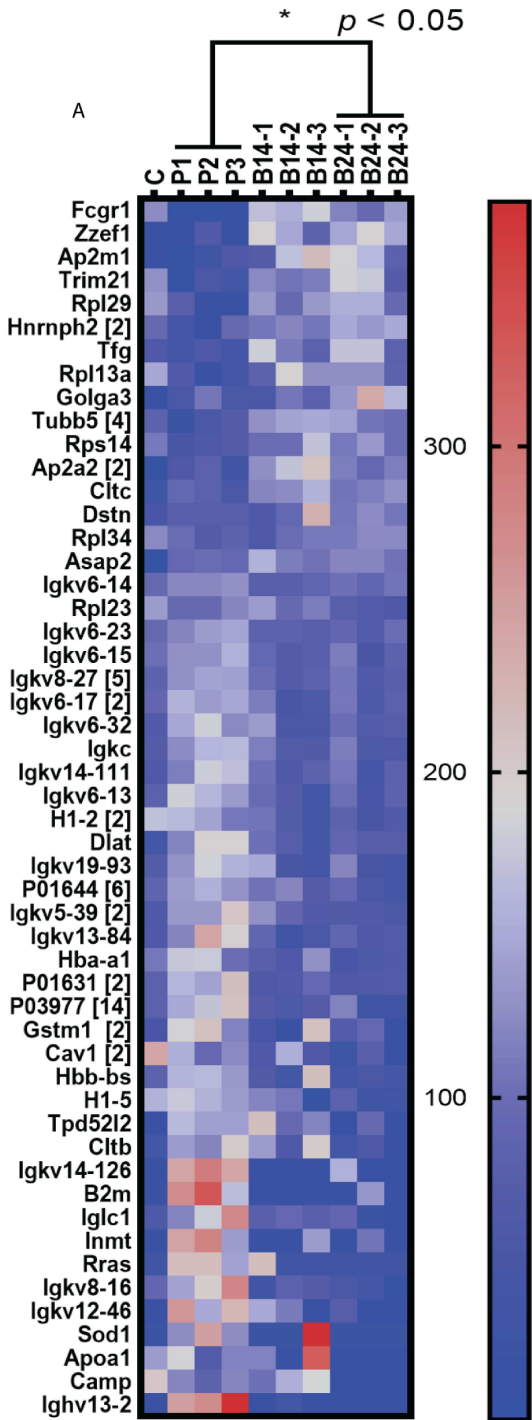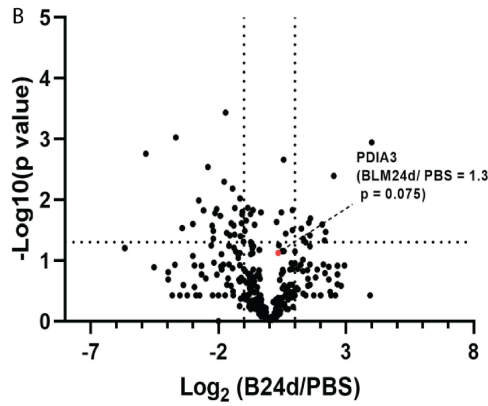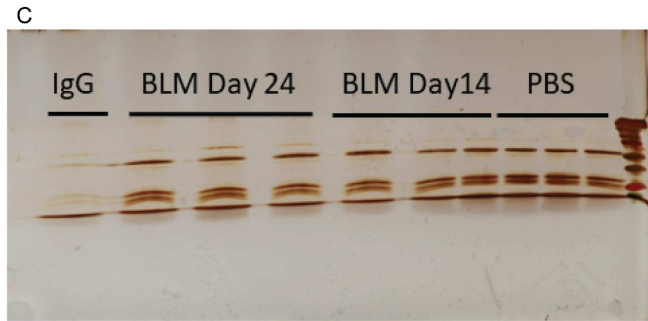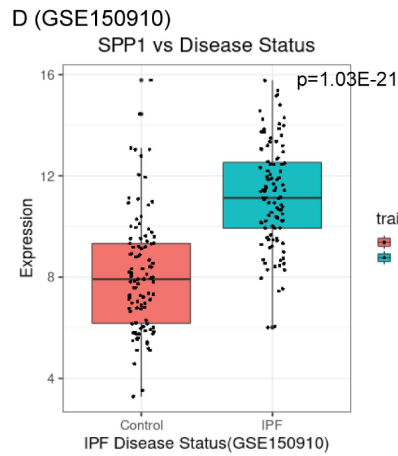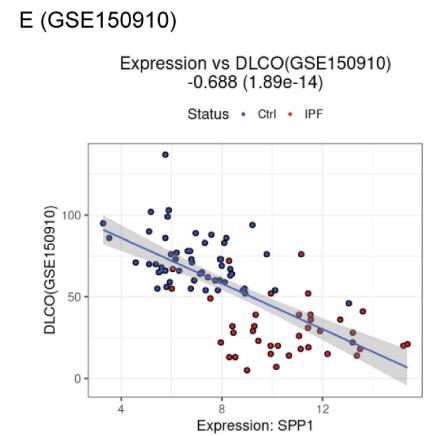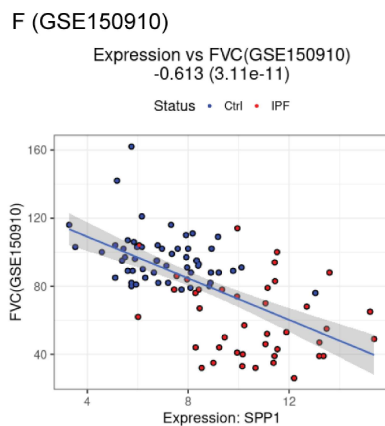

Supplement: thoraxjnl-2021-216882supp012.pdf [file thoraxjnl-2021-216882supp012.pdf]

Figure S6

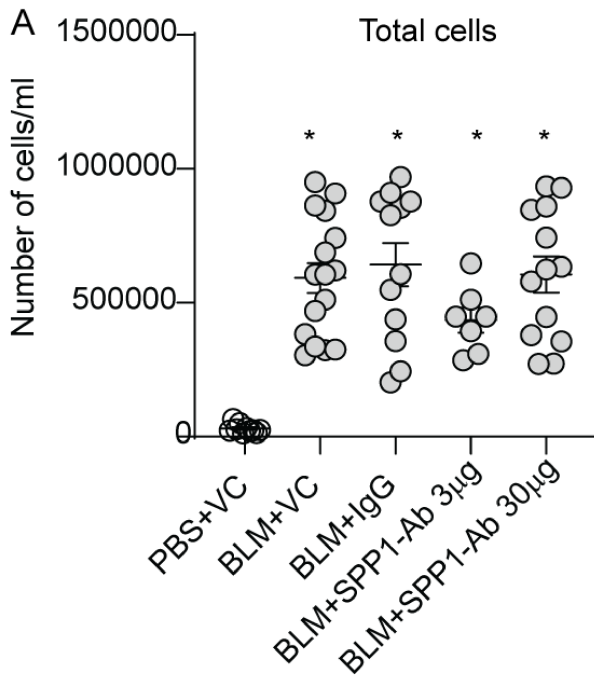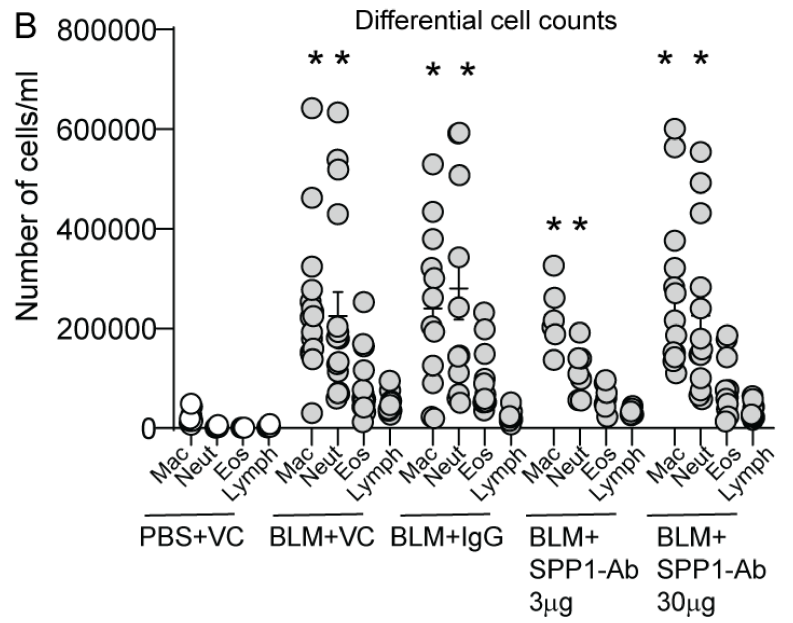

Supplement: thoraxjnl-2021-216882supp014.pdf [file thoraxjnl-2021-216882supp014.pdf]

Figure S7

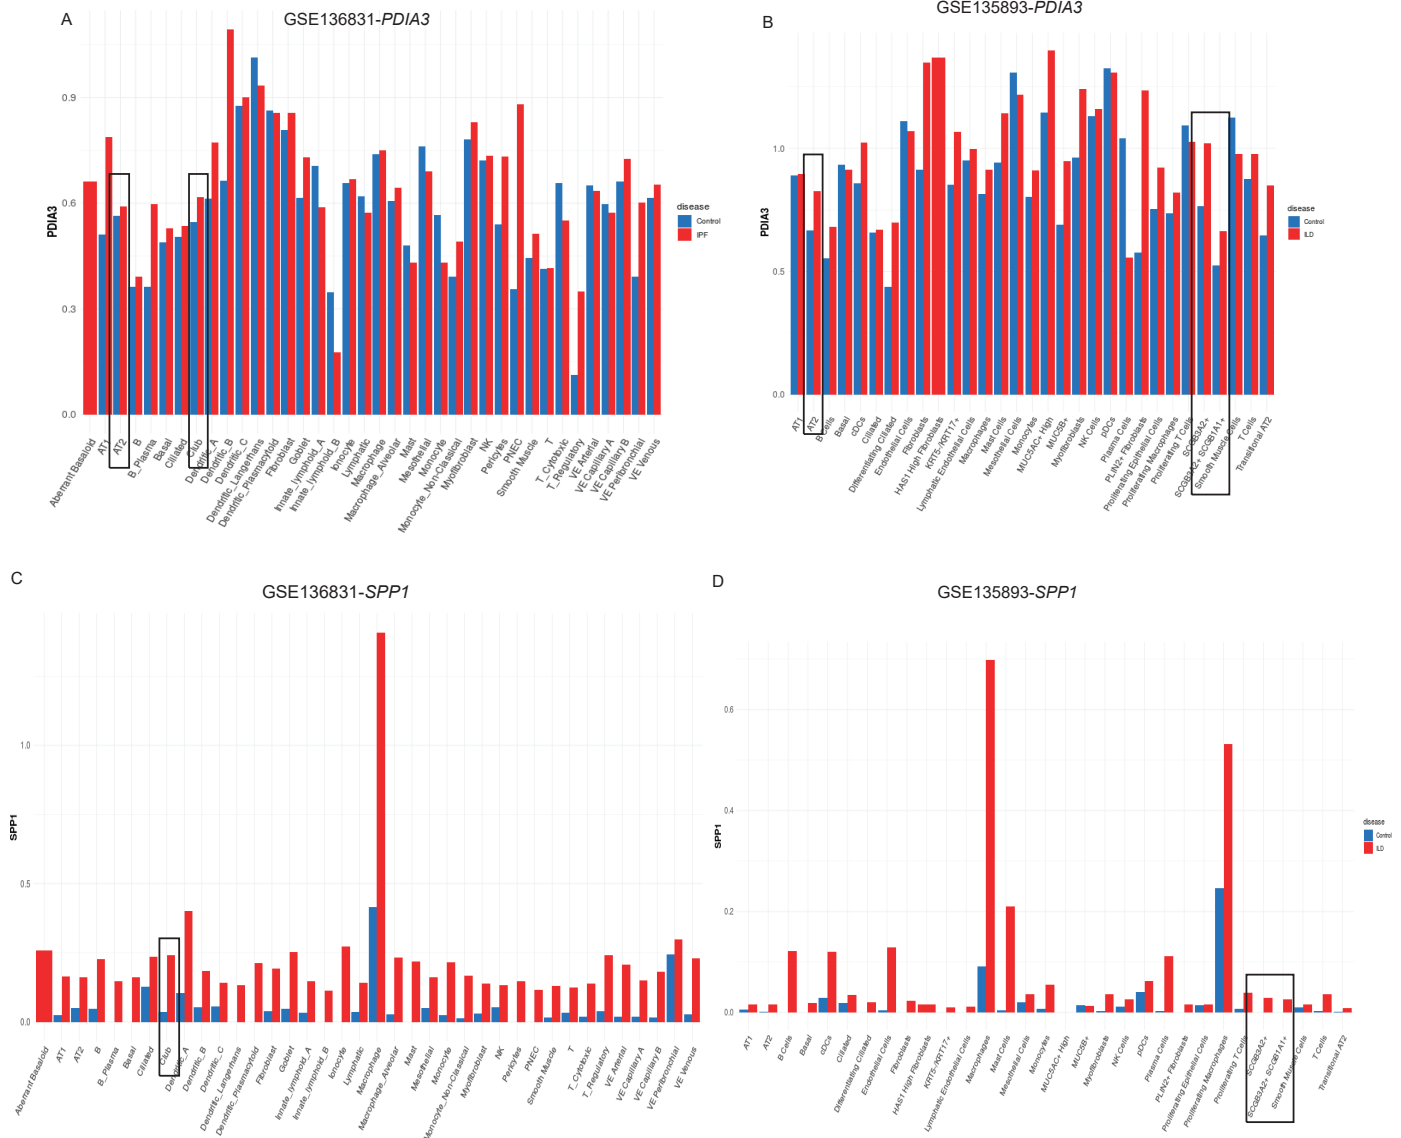

Supplement: thoraxjnl-2021-216882supp015.pdf [file thoraxjnl-2021-216882supp015.pdf]

Figure S8

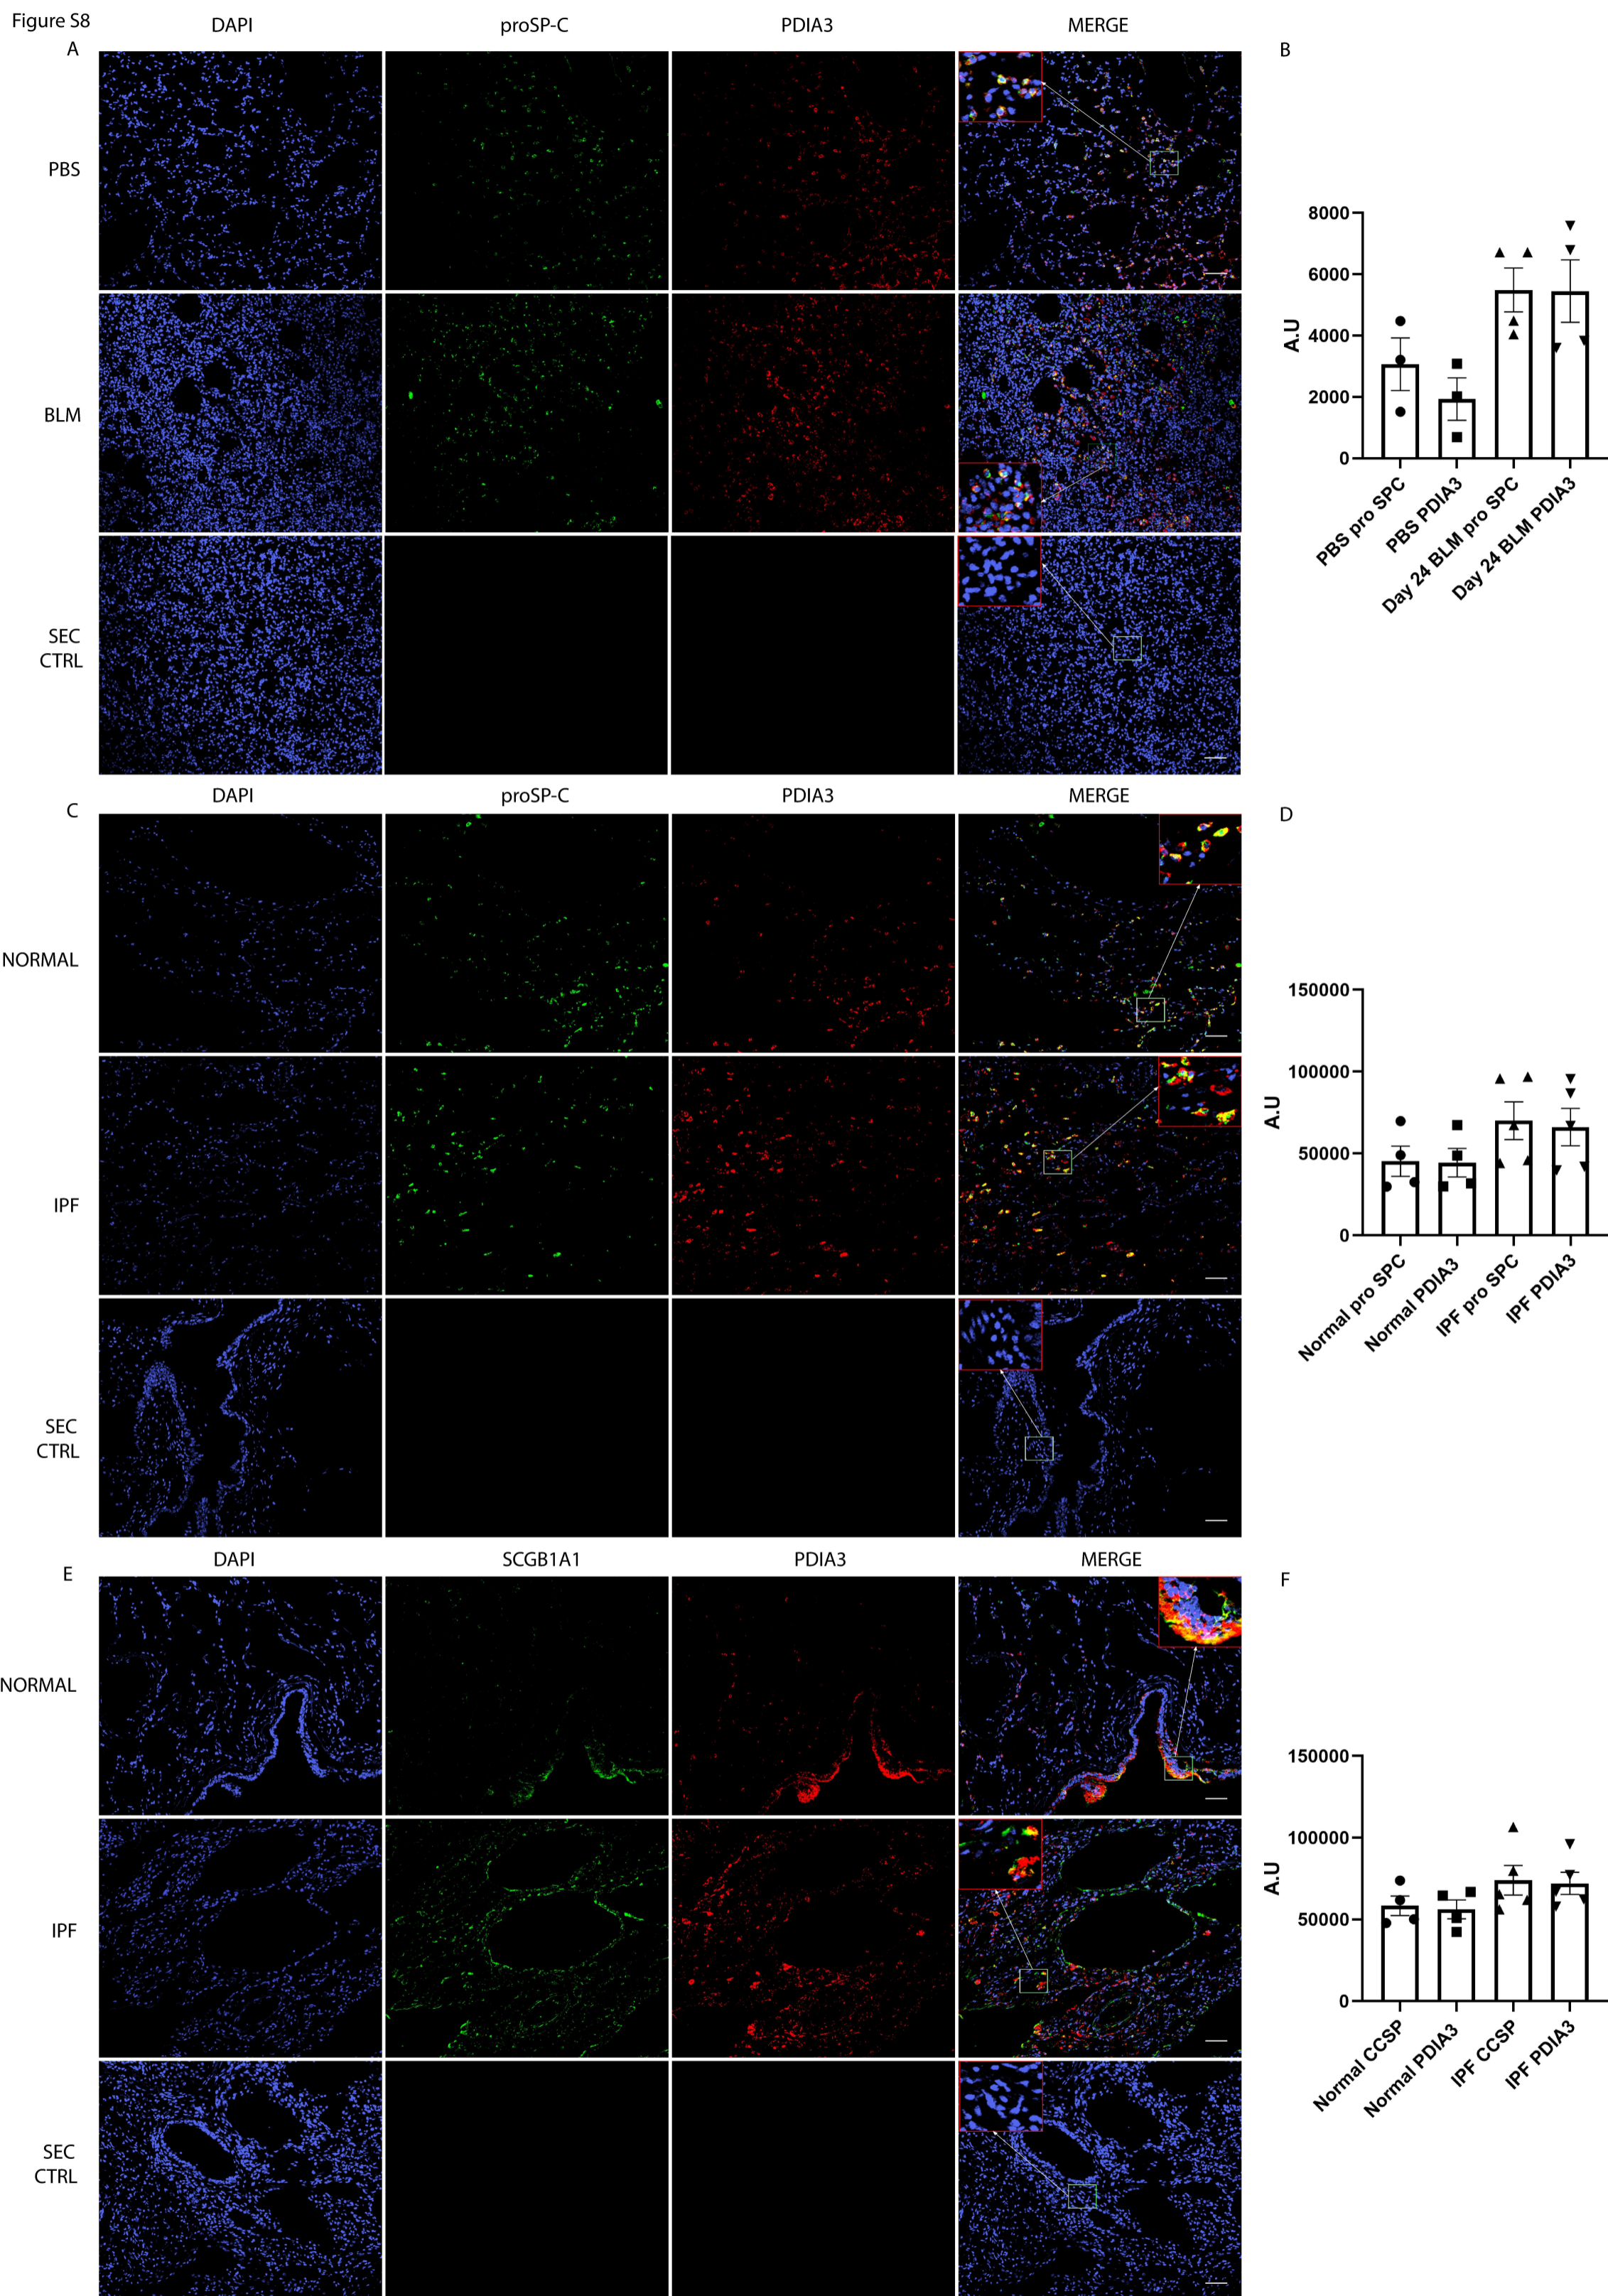

Supplement: thoraxjnl-2021-216882supp016.pdf [file thoraxjnl-2021-216882supp016.pdf]
